# Supplementary material for: Microglial cathepsin B as a key driver of inflammatory brain diseases and brain aging
Source: PubMed Central journal article supplement — Neural Regen Res. 2019 Sep 16;15(1):25–9. doi: 10.4103/1673-5374.264444 (PMC6862407; doi:10.4103/1673-5374.264444), 2019-09-16
Supplement: NRR-15-25_Suppl2.pdf [file NRR-15-25_Suppl2.pdf]

## OPEN PEER REVIEW REPORT 2

**Name of journal:** Neural Regeneration Research

**Manuscript NO:** NRR-D-19-00172

**Title:** Microglial cathepsin B as a key driver of inflammatory brain diseases and brain aging

**Reviewer's Name:** Maria E. Figueiredo-Pereira

**Reviewer's country:** USA

**Date sent for review:** 2019-04-01

**Date reviewed:** 2019-04-16

**Review time:** 15 days

### COMMENTS TO AUTHORS

This is a very interesting review that focuses on the unique role of cathepsin B in microglia function relevant to brain neurodegeneration.

The author focuses mostly on the work from his/her lab. The review would improve by adding different points of view.

In particular because the activity of cathepsin B at a neutral pH outside the lysosome is limited.
